# Supplementary material for: Electroless nickel plating on a biomineral-based sponge structure
Source: Royal Society of Chemistry journal article supplement (doi:10.1039/d1ma00909e), 2021-11-24
Supplement: d1ma00909e1.pdf [file d1ma00909e1.pdf]

## Electronic Supplementary Information

*Materials Advances* manuscript

‘Electroless nickel plating on biomineral-based sponge structure’

by H. Takeoka *et al.*

Corresponding authors:

Prof. Yuya Oaki; [oakiyuya@aplc.keio.ac.jp](mailto:oakiyuya@aplc.keio.ac.jp)

Prof. Syuji Fujii; [syuji.fujii@oit.ac.jp](mailto:syuji.fujii@oit.ac.jp)

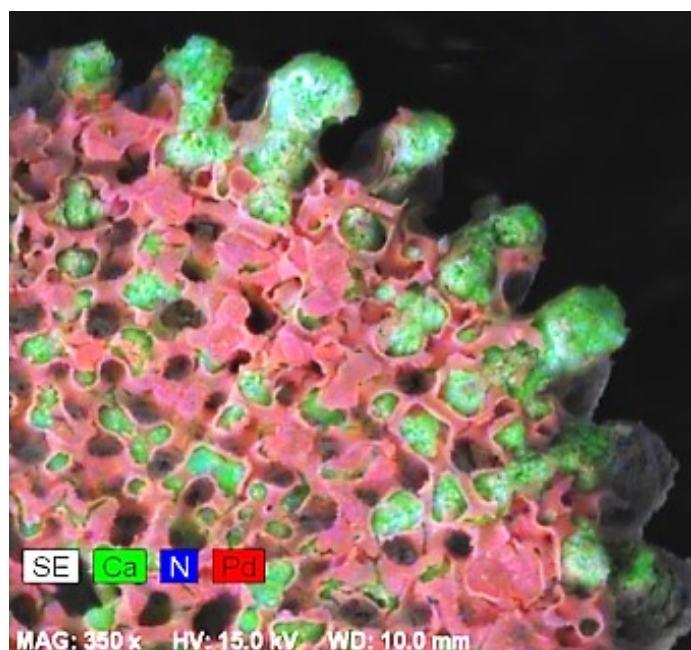

**Supporting Figure S1** An EDX image of biomaterial/PPy-Pd nanocomposite: Ca (green) and Pd (red).

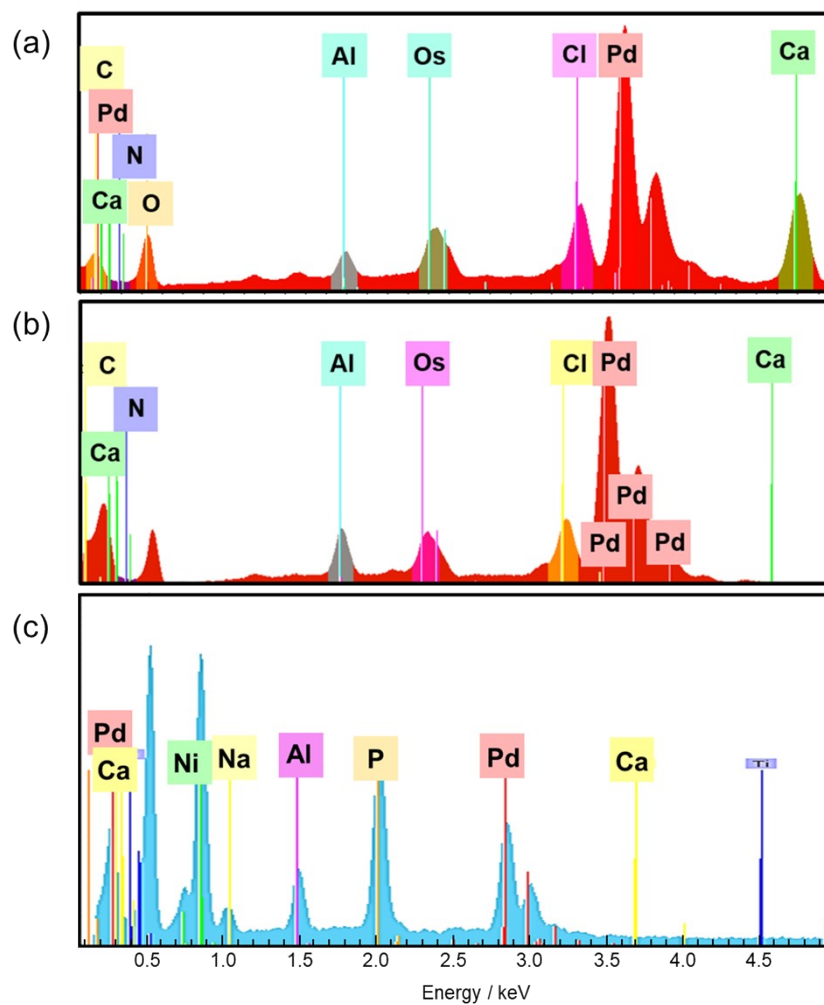

**Supporting Figure S2** EDX analyses of (a) biominerals/PPy-Pd nanocomposite, (b) PPy-Pd nanocomposite sponge material and (c) Ni-coated PPy-Pd nanocomposite sponge material.

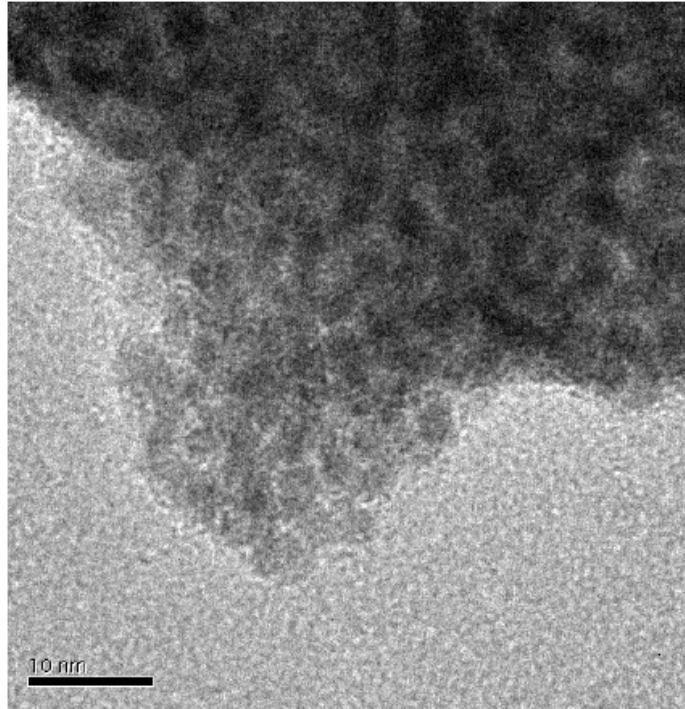

**Supporting Figure S3** A TEM image of PPy-Pd nanocomposite.

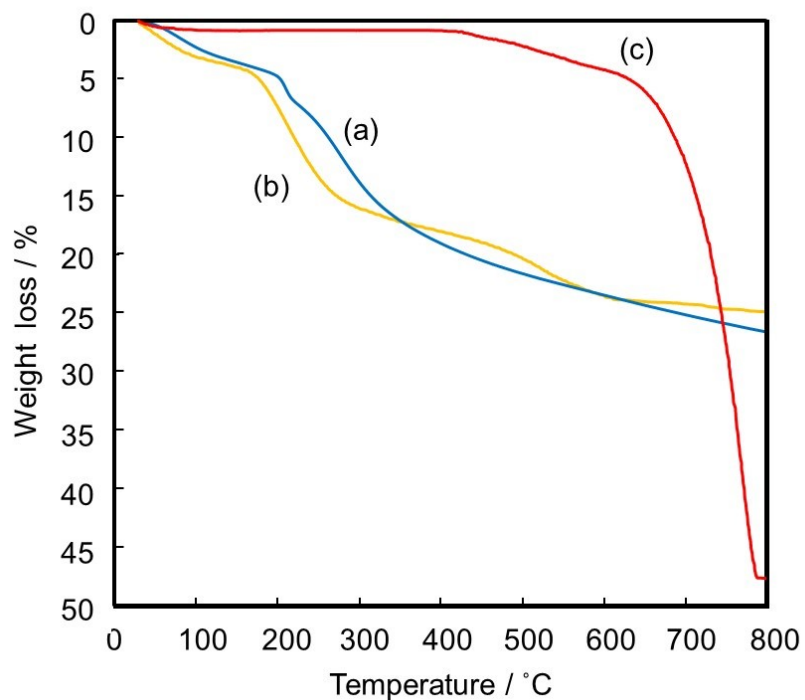

**Supporting Figure S4** TGA curves for (a) PPy-Pd nanocomposite bulk powder, (b) PPy-Pd nanocomposite sponge material and (c) biomaterial. The weight decrease observed in temperature range from 600 and 790 °C is due to decomposition into calcium oxide and carbon dioxide. [Y. Oaki, M. Kijima and H. Imai, *J. Am. Chem. Soc.*, 2011, 133, 8594-8599].
